# Supplementary material for: Distribution of tetraether lipids in agricultural soils – differentiation between paddy and upland management
Source: Copernicus journal article supplement (doi:10.5194/bg-13-1647-2016), 2016-03-17
Supplement: Supplementary file 2 [file bg-13-1647-2016-supplement.zip]

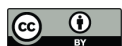

## *Supplement of*

# **Distribution of tetraether lipids in agricultural soils – differentiation between paddy and upland management**

**Cornelia Mueller-Niggemann et al.**

*Correspondence to:* Cornelia Mueller-Niggemann (cmn@gpi.uni-kiel.de) and Lorenz Schwark (ls@gpi.uni-kiel.de)

- [bg-13-1647-2016-supplement-title-page.pdf](#)
- [Supplementary figures \\_160208.pdf](#)
- [Supplementary tables \\_160208.xlsx](#)

The copyright of individual parts of the supplement might differ from the CC-BY 3.0 licence.
